# Supplementary material for: Core-shell CdSe@Pt nanocomposites with superior electrocatalytic activity enhanced by lateral strain effect
Source: Royal Society of Chemistry journal article supplement (doi:10.1039/c1jm11006c), 2011-01-01
Supplement: c1jm11006c.pdf [file c1jm11006c.pdf]

## Electronic Supplementary Information

### **Core-Shell CdSe@Pt Nanocomposites with Superior Electrocatalytic Activity Enhanced by Lateral Strain Effect**

Jinhua Yang,<sup>a</sup> Xiaojun Chen,<sup>a</sup> Feng Ye,<sup>b</sup> Caixia Wang,<sup>b</sup> Yuangang Zheng,<sup>a\*</sup> Jun Yang<sup>a,b\*</sup>

<sup>a</sup> *Institute of Bioengineering and Nanotechnology, 31 Biopolis Way, The Nanos, 04-01,  
Singapore 138669*

<sup>b</sup> *Institute of Process Engineering, Chinese Academy of Sciences, Beijing, China 100190*

\*E-mail: [zhengy@imre.a-star.edu.sg](mailto:zhengy@imre.a-star.edu.sg) (YZ); [jyang@mail.ipe.ac.cn](mailto:jyang@mail.ipe.ac.cn) (JY)

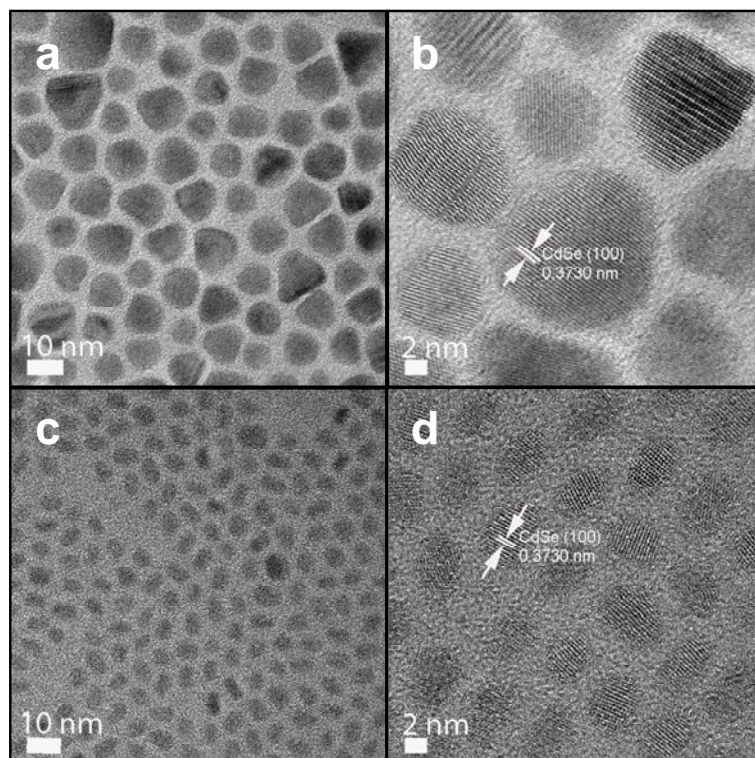

**Fig. S1** CdSe nanocrystals as-prepared: (a, c) TEM and (b, d) HRTEM images of CdSe nanocrystals with average sizes of (a, b) 10 nm and (c, d) 5 nm, respectively.

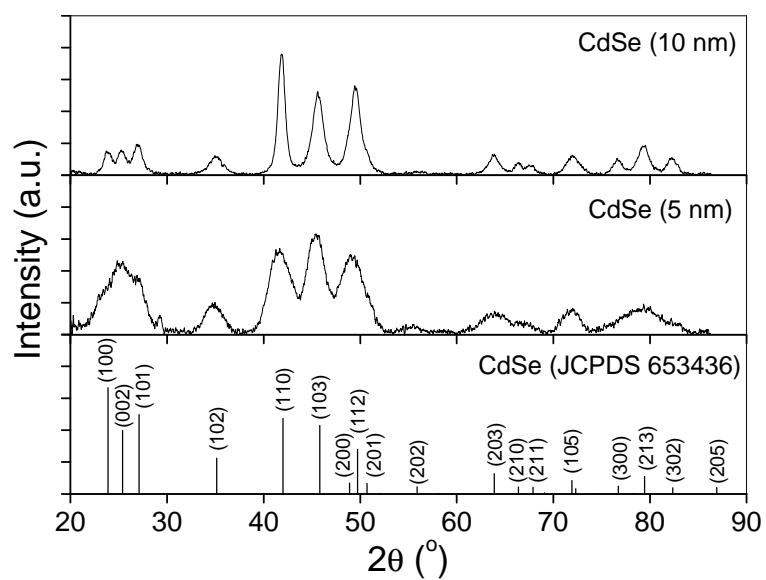

**Fig. S2** XRD patterns of CdSe nanocrystals of different sizes and CdSe reference (JCPDS 653436).

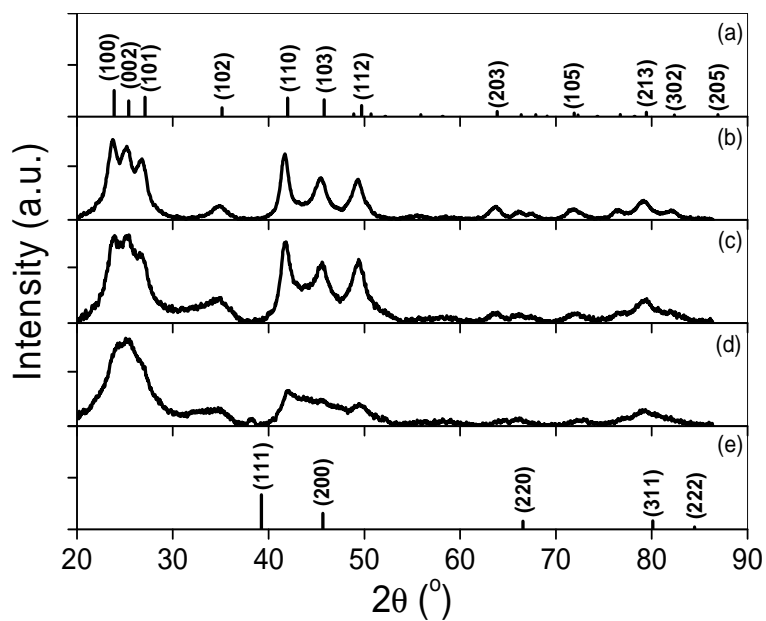

**Fig. S3** XRD patterns core-shell CdSe@Pt nanocomposites synthesized using 10 nm CdSe cores: (a) CdSe reference (JCPDS 653436,  $d(110) = 0.2150$ ), (b, c, d) core-shell CdSe@Pt nanocomposites at CdSe/Pt molar ratio of 2/1, 1/1, and 1/2, respectively, and (e) Pt reference (JCPDS 882343,  $d(111) = 0.2292$ ).

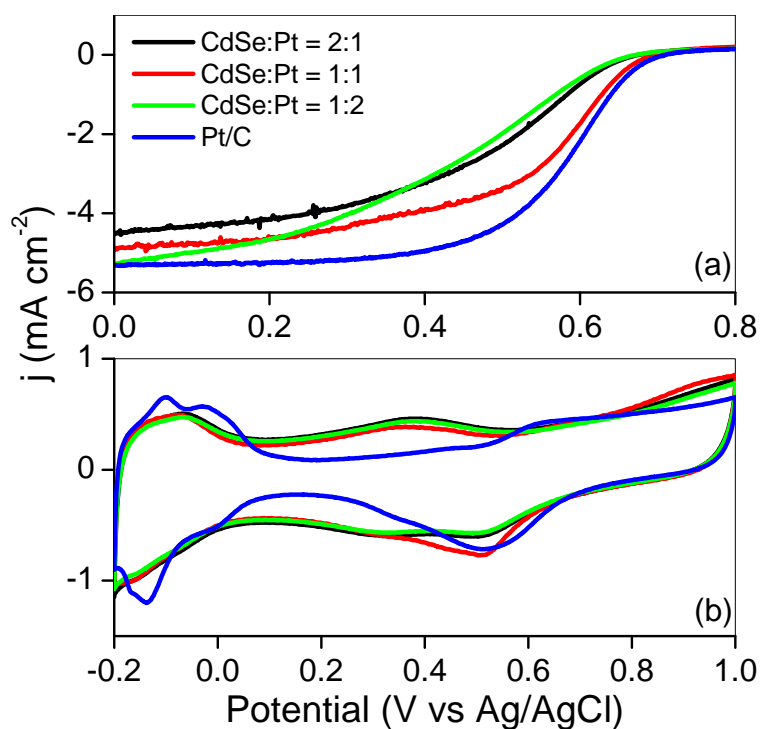

**Fig. S4** Electrochemical characterization of the core-shell CdSe@Pt nanocomposites synthesized using 10 nm CdSe cores: (a) ORR polarization curves for the core-shell CdSe@Pt nanocomposites at different CdSe/Pt molar ratios and commercial Pt/C catalysts, recorded at room temperature in an O<sub>2</sub>-saturated HClO<sub>4</sub> solution (0.1 M) at a sweep rate of 20 mV·s<sup>-1</sup> and a rotating speed of 1600 rpm; (b) Cyclic voltammograms of core-shell CdSe@Pt nanocomposites at different CdSe/Pt molar ratios and commercial Pt/C catalysts in argon-purged HClO<sub>4</sub> (0.1 M) at room temperature. Sweep rate = 50 mV s<sup>-1</sup>.

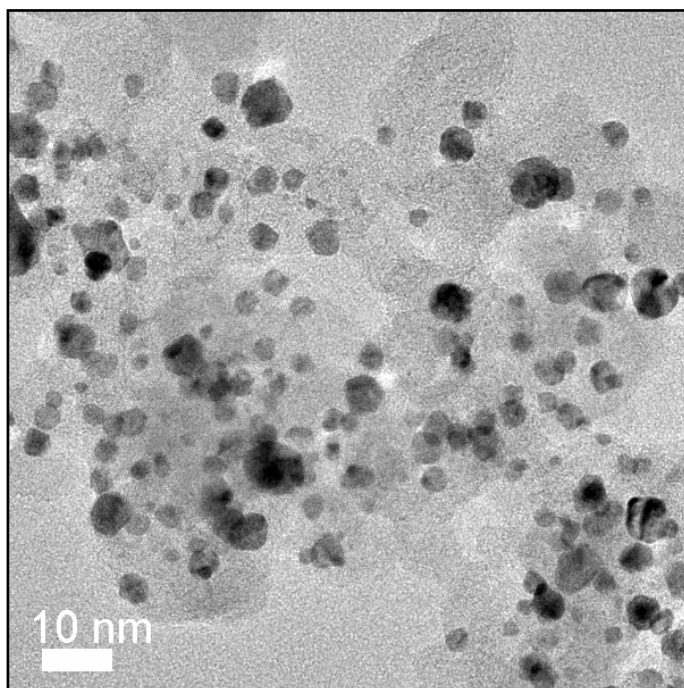

**Fig. S5** TEM image of the Pt/C (E-TEK) catalysts, which consisted of  $\sim 3.2$  nm Pt nanoparticles (20 wt%) on Vulcan XC-72 carbon support.

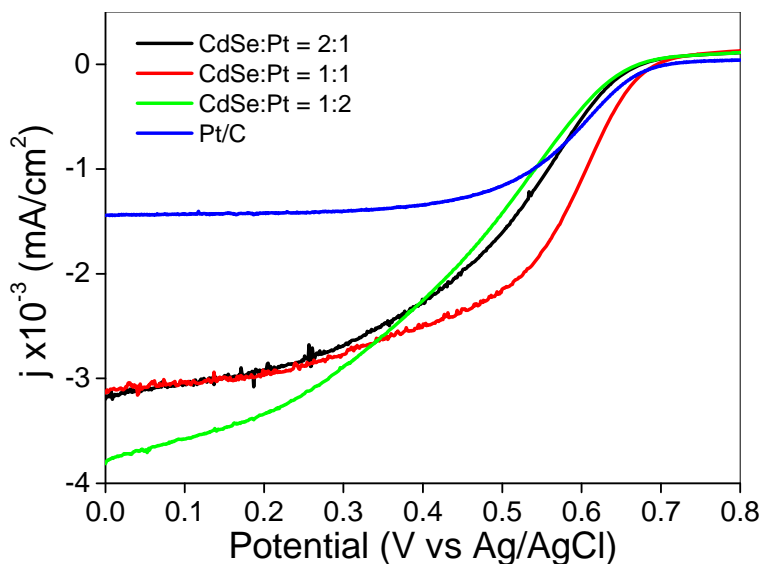

**Fig. S6** ECSA-specific ORR polarization curves for the core-shell CdSe@Pt nanocomposites at different CdSe/Pt molar ratios and commercial Pt/C catalysts, recorded at room temperature in an O<sub>2</sub>-saturated HClO<sub>4</sub> solution (0.1 M) at a sweep rate of 20 mV·s<sup>-1</sup> and a rotating speed of 1600 rpm.

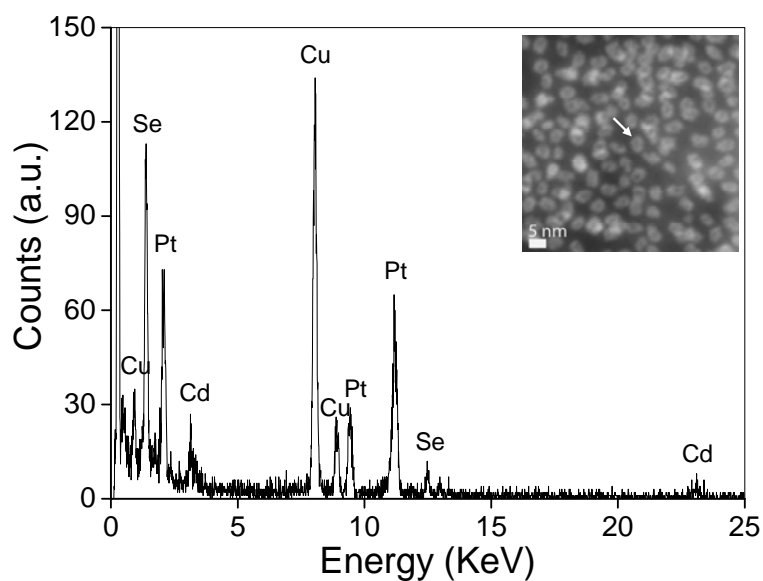

**Fig. S7** EDX analysis of single core-shell CdSe@Pt nanocomposite labeled in the inset STEM image.

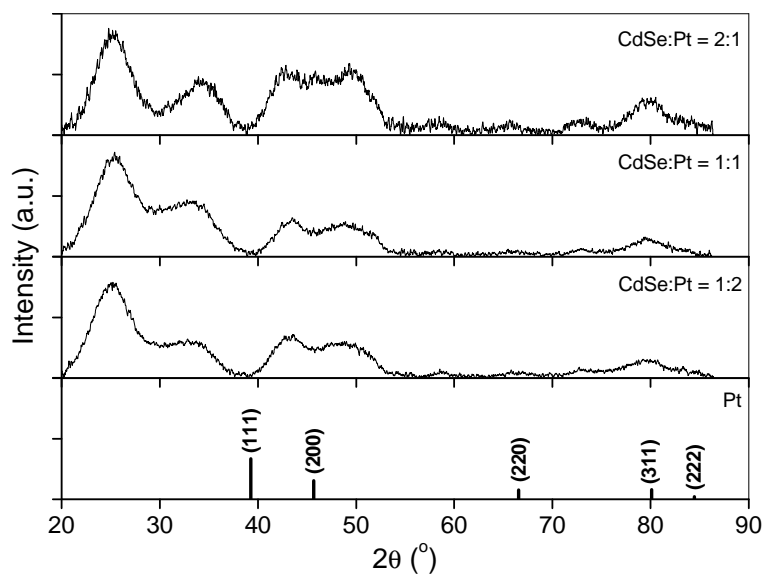

**Fig. S8** XRD patterns core-shell CdSe@Pt nanocomposites using 10 nm CdSe cores at different CdSe/Pt molar ratios and Pt reference.

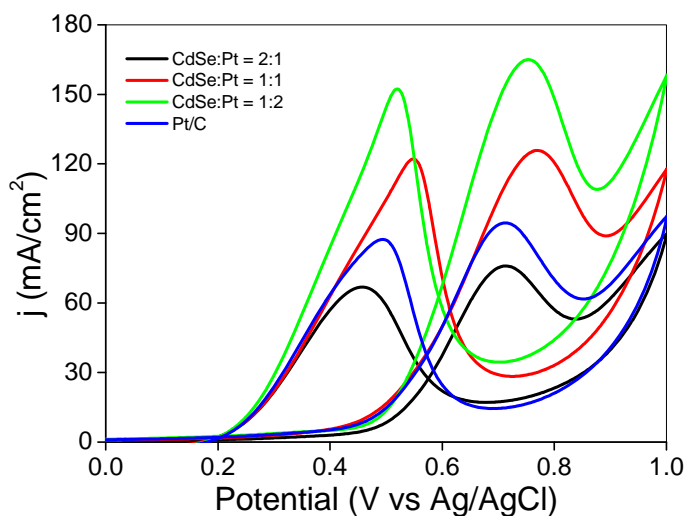

**Fig. S9** Cyclic voltammograms of core-shell CdSe@Pt nanocomposites synthesized using 5 nm CdSe cores in argon-purged HClO<sub>4</sub> (0.1 M) with methanol (1 M). Sweep rate: 20 mV s<sup>-1</sup>; room temperature.

**Table S1** Electrochemical measurements of methanol oxidation on small core-shell CdSe@Pt nanocomposites and commercial Pt/C catalysts.

| Materials     | Forward scan peak potential (V) | Forward scan peak current density (mA·cm <sup>-2</sup> ) | Backward scan peak potential (V) | Backward scan peak current density (mA·cm <sup>-2</sup> ) |
|---------------|---------------------------------|----------------------------------------------------------|----------------------------------|-----------------------------------------------------------|
| CdSe@Pt (2/1) | 0.71                            | 76.3                                                     | 0.46                             | 67.0                                                      |
| CdSe@Pt (1/1) | 0.77                            | 126.4                                                    | 0.55                             | 122.3                                                     |
| CdSe@Pt (1/2) | 0.75                            | 165.8                                                    | 0.52                             | 152.3                                                     |
| Pt/C          | 0.71                            | 95.2                                                     | 0.50                             | 87.4                                                      |
